# Supplementary material
Source: Research Square preprint supplement (doi:10.21203/rs.3.rs-9850224/v1)
Supplement: Supplementary file 1 [file 97d38aa8c13c4c85bc23a226.docx]

| Variables | |
| --- | --- |
| Variables | Definition |
| ***Dependent Variables***  *Digital Technology Innovation* |  |
| MDTI | Mitigation Digital Technology innovation |
| ADTI | Adaptation Digital Technology Innovation |
| ***Independent Variables***  *Performance Feedback* |  |
| FBB | Below-aspiration Feedback |
| FBI | Inconsistent Feedback |
| FBC | Consistent Feedback |
| ***Moderating Variables***  *Conceptualizes CEO attentional Vigilance* |  |
| EA | Attention Quantity |
| VA | Attention Stability |
| ***Control Variables*** |  |
| Size | the logarithm of total assets |
| ListAge | years since IPO |
| Board | Board size |
| Indepa | Board Independence |
| Dual | CEO Duality |
| Top10 | The proportion of a firm’s shares held by its top ten shareholders |
| Lev | Total Assets/Total Shareholders’ Equity |
| ROE | Net income/Shareholders’ Equity |
| ATO | Sales/Total Assets |
| INV | Inventory/Total Assets |
| INST | Shares held by institutional investors/Total outstanding shares |
| TobinQ | (Market Value of Equity + Total Liabilities)/Total Assets |
